# Supplementary material
Source: Springer Nature journal article supplement (https://www.springermedizin.de/resource/supplementary/12879_2007_661_MOESM3_ESM.pdf/9449454)

# Incidence density

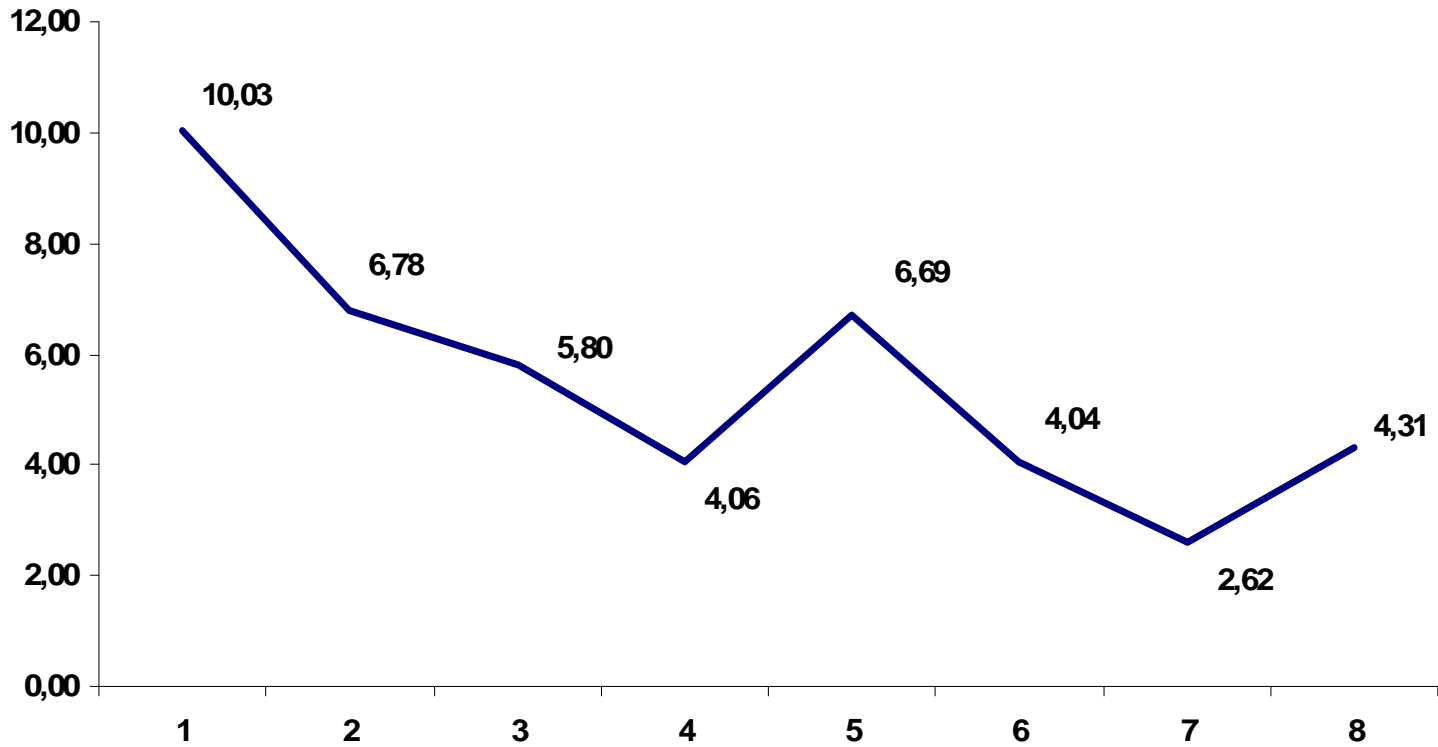

Number of subsequent 6-month periods

Supplement: MOESM3 [file 9449454]
